# Supplementary material
Source: publisher figshare collection journal article supplement (https://acs.figshare.com/ndownloader/files/3924373)
Supplement: Supplementary file 1 [file 3924373]

## Supporting Information

# Controlled Protein Embedment onto Au/Ag Core Shell Nanoparticles for Immuno-Labeling of Nanosilver Surface

In Hwan Lee, Jeong Min Lee, and Yongwon Jung\*

Department of Chemistry, Korea Advanced Institute of Science and Technology, Daejeon 305-701,  
Korea

Peptide-Protein G:

M C A E A A A K E A A A K E A A A K A T Y K L V I N G K T  
L K G E T T T K A V D A E T A E K A F K Q Y A N D N G V D  
G V W T Y D D A T K T F T V T E

Peptide Linker:

C A E A A A K E A A A K E A A A K A

Peptide Linker-TAMRA:

C A E A A A K E A A A K E A A A K A K-TAMRA

**Figure S1** Amino acid sequences of peptide-fused protein G construct (Peptide-Protein G), a synthetic helical peptide linker with (Peptide Linker-TAMRA) or without a TAMRA dye (Peptide Linker). A rigid helical peptide sequence is indicated underline.

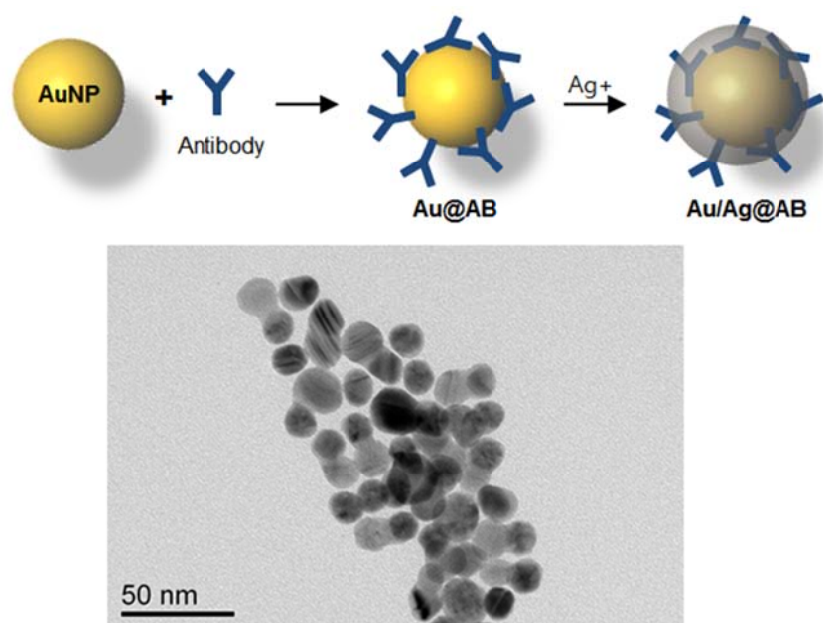

**Figure S2** TEM image of silver deposited Au@AB (Au/Ag@AB).

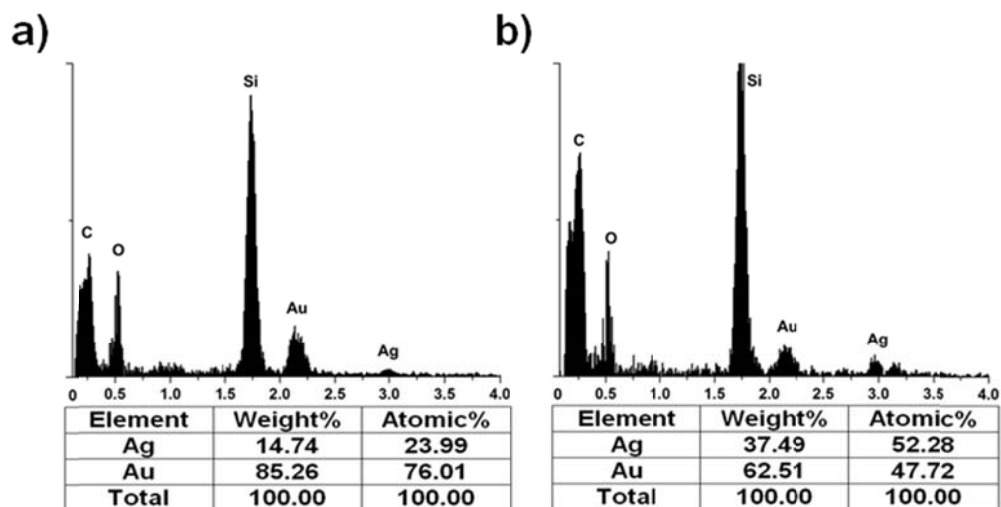

**Figure S3** Single-particle X-ray energy dispersive spectroscopy (EDS) analysis of the prepared Au/Ag core shell nanoparticles, (a) Au/Ag@PG-1 and (b) Au/Ag@PG-2.

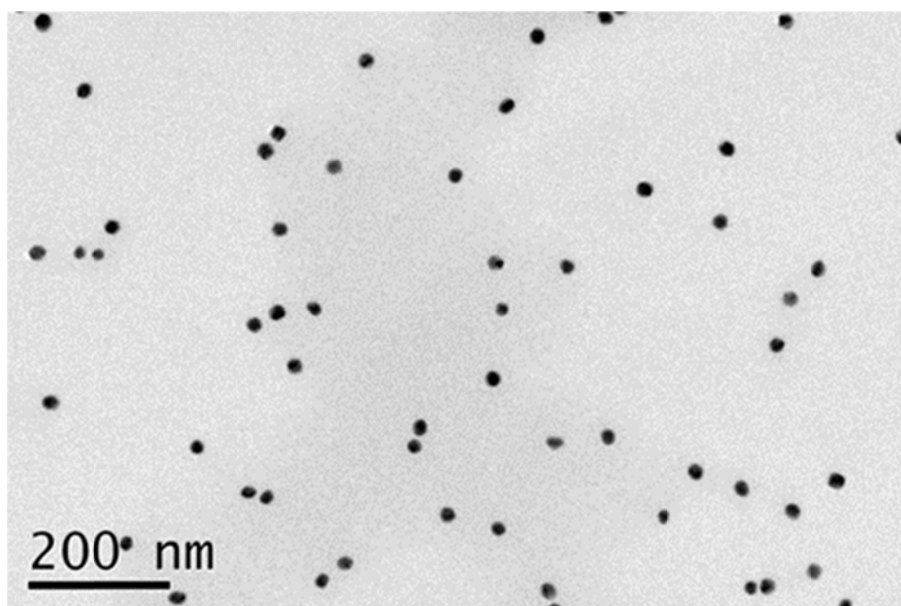

**Figure S4** TEM image of Au/Ag@PG-AB.

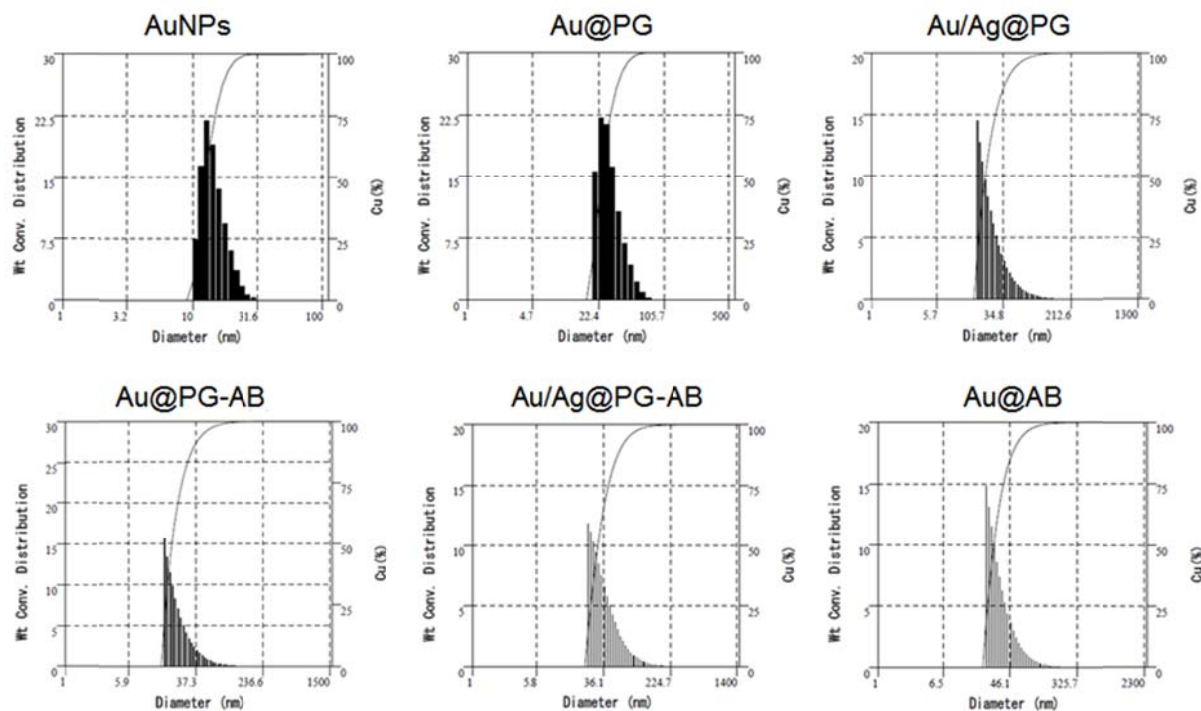

**Figure S5** Direct light scattering (DLS, ELS-Z of Otsuka electronics) measurements: AuNPs ( $d = \text{avg. } 14.1 \pm 3.1 \text{ nm}$ ); Au@PG ( $d = \text{avg. } 28.3 \pm 8.5 \text{ nm}$ ); Au/Ag@PG ( $d = \text{avg. } 29.1 \pm 7.0 \text{ nm}$ ); Au@PG-AB ( $d = \text{avg. } 33.4 \pm 7.7 \text{ nm}$ ); Au/Ag@PG-AB ( $d = \text{avg. } 34.5 \pm 8.4 \text{ nm}$ ); Au@AB ( $d = \text{avg. } 38.3 \pm 19.8 \text{ nm}$ ). Histograms show weight conversion (Wt. Conv.) distributions of the particles.

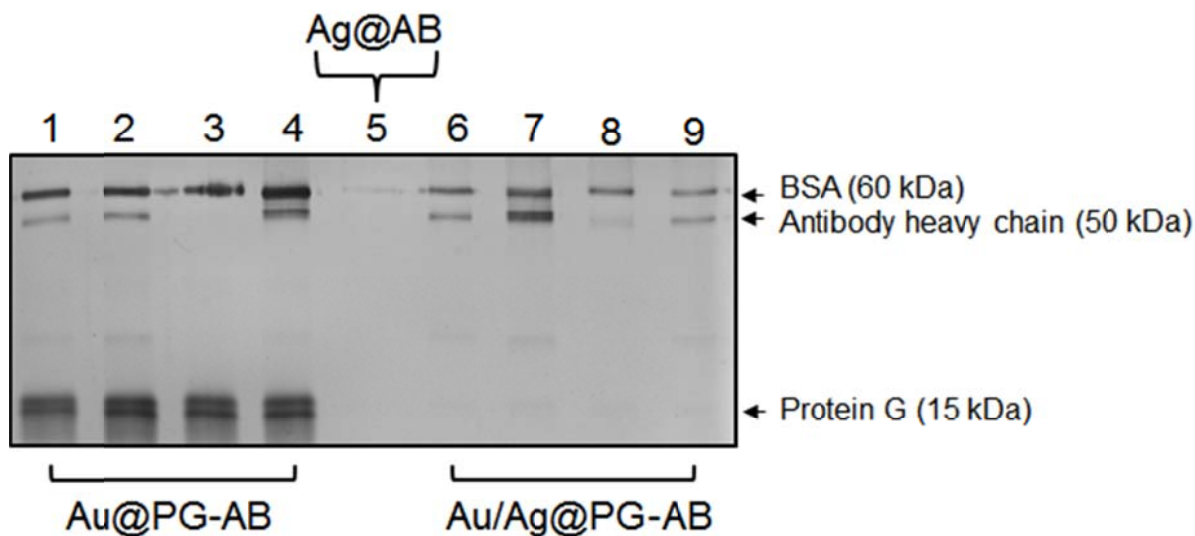

**Figure S6** 15% SDS-PAGE analysis of antibodies bound to Au@PG conjugates before (Au@PG-AB; lanes 1-4) and after the silver shell formation (Au/Ag@PG-AB; lanes 6-9): human IgG (lanes 1 & 6); IL-6 antibody (lanes 2 & 7); biotin antibody (lanes 3 & 8); CCL20 antibody (lanes 4 & 9). Nonspecific antibody adsorption to AgNP surface was also examined (Ag@AB; lane 5). Particle blocking BSA, antibody heavy chain, and protein G proteins were indicated.

**Discussion:** Antibody adsorption to AgNPs was highly inefficient as shown in lane 5. Biotin antibody was not immobilized to ProteinG-AuNP conjugates. Monoclonal mouse IgG1 form of biotin antibody was unable to bind to protein G, while IL-6 and CCL20 antibodies (from goat) effectively bind to protein G.

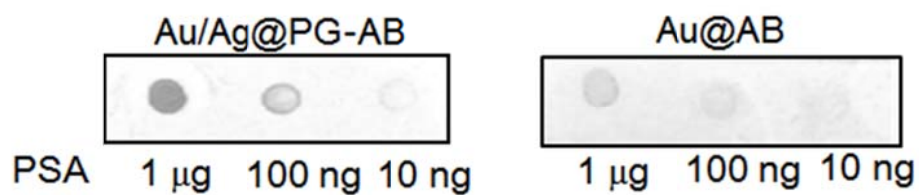

**Figure S7** *In vitro* binding experiments. A series of diluted PSA solutions were spotted on an NC membrane. Antibody-conjugated Au/Ag core shell NPs via embedded protein G (Au/Ag@PG-AB) and antibody adsorbed AuNPs (Au@AB) were treated to the PSA spotted membrane.

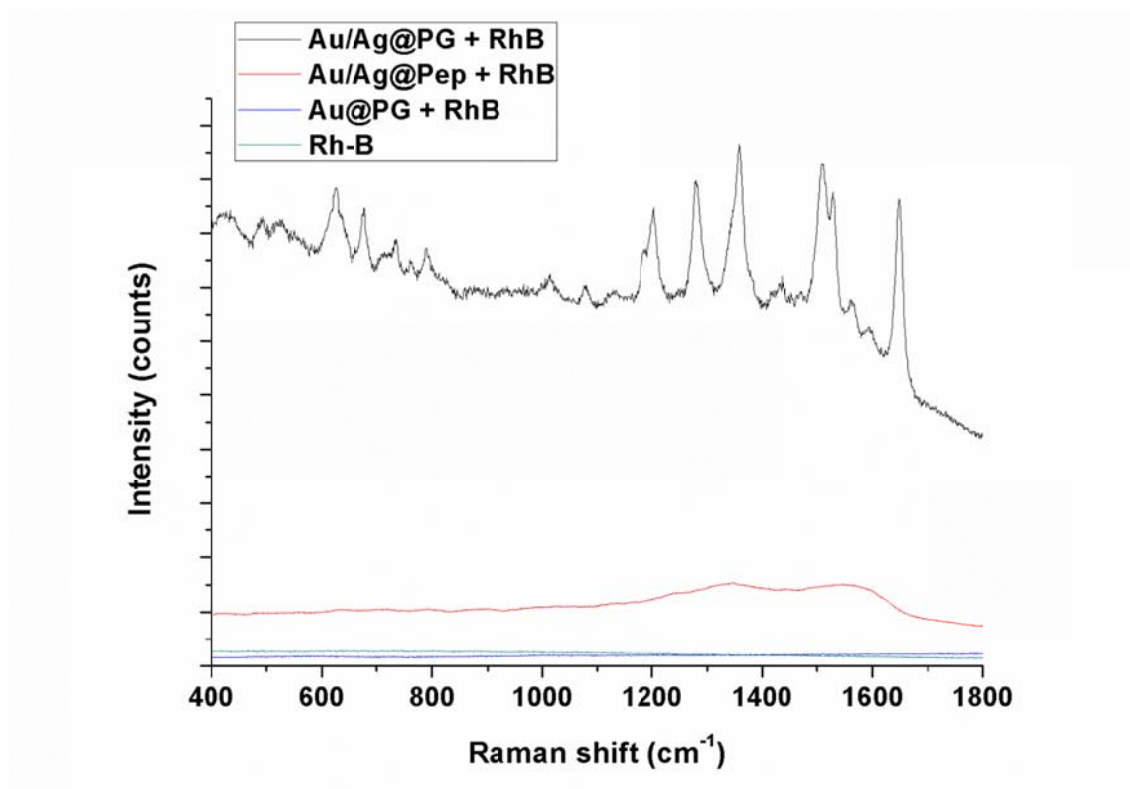

**Figure S8** Raman spectra of surface treated Rhodamin B dye (RhB). RhB was deposited on antibody adsorbed gold chip surfaces additionally covered with Au/Ag@PG (black), Au/Ag@peptide (red), and Au@PG (green). RhB was also deposited on the gold chip without any nanoparticles (blue). Typical Raman peaks of RhB in the 1200~1700 cm<sup>-1</sup> region are 1200, 1282, 1361, 1510, 1533 and 1652 cm<sup>-1</sup>, which agree nicely with above surface-enhanced Raman spectra (Au/Ag@PG + RhB).
